# Supplementary material
Source: Springer Nature journal article supplement (https://www.springermedizin.de/resource/supplementary/12874_2008_318_MOESM3_ESM.pdf/9434254)
Supplement: MOESM3 [file 9434254]

OR: 1; 1.5 & 3

Number of trials: 5; 10; 20 & 30

Heterogeneity intensity: 0; 1; 1.5 & 2

Situation 1

No PB

Situation 2

Severe PB  
by p-value

Situation 3

Moderate PB  
by p-value

Situation 4

Severe PB by  
Effect size

Situation 5

Moderate PB  
by Effect size
